# Supplementary material
Source: Research Square preprint supplement (doi:10.21203/rs.3.rs-8918766/v1)
Supplement: Supplementary file 1 [file 83509c89e880bce5f968bd9b.docx]

**Vaccine decision-making in Afghanistan: stakeholder analysis and evidence synthesis of policies and processes during 2010-2021**

**Supplement file**

**Appendix 1.** **Semi-structured topic guide**

The semi-structured guide will cover the following questions:

- - 1. Can you tell me a bit more about yourself? And your work at organisation X?
    2. What is your experience with vaccination policies and programs in Afghanistan/low-income countries?
    3. Can you tell me about the process of vaccine decision-making in Afghanistan?
    4. How does the decision-making happen?
    5. Have you been involved in any decision-making platforms? Name them? How do you find it? Effective? Participatory? Transparent? Fair? Influenced? If yes, by whom?
    6. In your opinion, how are the scope and quality of evidence considered?
    7. Is the crude list of stakeholders exhaustive? Can you suggest new names/organisations to be consulted?
    8. In your opinion, have the stakeholders/agencies shared information or interacted with other stakeholders over the past year?
       1. If yes, number of contacts/ the substance of the contact?
    9. What are their attitudes towards the different stakeholders? Can you define in terms of positive/neutral/negative?
       1. If negative, why?
    10. To what extent do they think the vaccine decision-making process is fair, transparent, and effective?
        1. What are the strengths?
        2. What are the weaknesses?
        3. What are the threats?
        4. What are the opportunities?

Concluding

- - 1. What should change, according to you, to improve the decision-making process?
    2. What do you think we can learn from the existing practice?

Would you like to add anything?

**Figure S1. Flowchart of study participants recruitment, 2021-2022.** This flowchart outlines the recruitment process for study participants, identified through various sources, including EPI Taskforce attendance sheets, ICC/HSS meeting minutes, NITAG meeting minutes, and the researcher’s prior knowledge. A total of 18 interviews were conducted. EPI – Expanded Programme on Immunisation; NITAG – National Immunisation Technical Advisory Group; ICC – Interagency Coordination Committee; HSS – Health System Strengthening.

The initial list of potential participants

were identified based on:

Attendance sheets of EPI Taskforce

ICC/HSS meetings minutes

NITAG meeting minutes

Researcher’s priori knowledge

**n=28**

**n=28**

The list was validated with the EPI and NITAG secretariat

**n=2**

Added to the list

**n=4**

Dropped from the list

- Identified as irrelevant to the study topic because they were more involved in project implementation specific to the polio eradication programme

**n= 26**

Final list of participants

**n= 18**

Interviews conducted and included in data analysis

**n=6**

Invitation to the interview remain unanswered

**n=2**

Invitation declined

**Table S1. National documents accessed to review Afghanistan’s vaccine policy architecture.** The documents reviewed range from programme documents and national health policies to meeting minutes and website content. These documents were official terms of reference (TORs), steering committee reports, multi-year plans/EPI strategy documents, policy and strategy documents, as well as records from key meetings and online resources.

| **Type of source** | **Sources reviewed** |
| --- | --- |
| **Programme documents** | 1. Afghanistan NITAG Terms of Reference (TOR) (January 2012, MoPH) 2. ICC/HSS steering committee TOR (2016, updated June 2019, MoPH) 3. Afghanistan immunisation programme joint appraisal reports (2015, 2016, 2017, 2018, 2019, 2020, MoPH) 4. TORs of MoPH different forums and steering committees (2018, MoPH) 5. EPI Comprehensive Multi-year Plans (cMYP) (2011-2015, 2016-2020, 2021-2025, National EPI/MoPH) 6. MoPH Policies (2010-2015 and 2015-2020, MoPH) 7. MoPH Strategies (2011-2015 and 2016-2020, MoPH) 8. Afghanistan National Development Strategy (2008-2013) |
| **Meeting minutes** | 1. NITAG meetings (January 2012, January 2013, November 2013, May 2015, September 2016 & May 2018, EPI/MoPH) 2. ICC/HSS meetings (April & December 2016, June & August 2017, January, April & September 2018, March 2019, December 2020, MoPH) 3. EPI Taskforce (10 random minutes between 2017 and 2020, EPI/MoPH) |
| **Websites and webpage search** | MOPH: <https://moph.gov.af/en>  WHO: <https://www.who.int/countries/afg>; <https://www.emro.who.int/>  UNICEF: <https://www.unicef.org/afghanistan/>; <https://www.unicef.org/>  Gavi: <https://www.gavi.org/programmes-impact/country-hub/eastern-mediterranean/afghanistan>  Global NITAG Network: <https://www.nitag-resource.org/>  Google: <https://scholar.google.ca/> ; <https://www.google.com/> |

**Table S2. Themes identified from the key-informant interviews and document review, relevant policy questions, and implications for vaccine policy decision-making.** Study findings highlight the influence of donor funding, the need for country-level evidence synthesis, the importance of local interrogation of WHO/UNICEF recommendations, and the requirement for a systematic comparison of vaccine options. Additionally, it highlighted the need for robust recommendation committees, expanded capacity for assessing technical and programmatic feasibility, and inclusive stakeholder dynamics to enhance the vaccine policy framework in Afghanistan.

| **Theme** | **Relevant vaccine policy questions** | **Implications and recommendations for vaccine policy decision-making** |
| --- | --- | --- |
| Donor funds drive priorities | - Should PCV be introduced? - Should rotavirus vaccine be introduced? - Should MR be prioritised over rotavirus vaccine? | - Fairer process for prioritising topics for appraisal. - Planning for increased government self-financing (and influence) on public health intervention decisions. |
| Country-level synthesis of evidence | - Should rotavirus vaccine be introduced? | - Formal process for evidence synthesis e.g., a multidisciplinary NITAG working group tasked with generating and preparing evidence. - Better integration of cost-effectiveness analysis with other evidence. |
| Country-led interrogation of WHO/UNICEF recommendations | - Not specified | - Increased financial resources for country-led evidence synthesis to reflect local data and context. - Formal process for evidence appraisal. |
| Comparison of available vaccine policy options | - Should ROTARIX or ROTATEQ be introduced? - What vaccine presentation should be considered? | - Need for a vaccine policy decision-making framework tailored to the Afghan context. - Need for generating country-specific evidence. - Standardise the process of evaluating the evidence. - Fairer process for priority-setting. |
| Weak or dysfunctional recommendation committees | - Should rotavirus vaccine be introduced? | - Need for stronger institutional recommendation committees. - Need for engagement of all stakeholders. |
| Predominant reliance on evidence of programmatic feasibility | - Not specified | - Expand the existing capacity for country-level generation and assessment of programmatic feasibility to other decision criteria. |
| Stakeholder dynamics | - Not specified | - Need for a fair selection process for stakeholder engagement. - Need for an inclusive and participatory vaccine policy decision-making process, allowing views of all stakeholders to be challenged and debated in a respectful way. |

**Table S3. Network analysis scoring system adapted from Heo H.et. al (2020) paper***

| **Assessment area** |  | **Scores** |
| --- | --- | --- |
| Knowledge | No Knowledge | 0 |
| Limited Knowledge | 1 |
| General Knowledge | 2 |
| extensive knowledge | 3 |
| Interest | No interest | 0 |
| Limited interest | 1 |
| General interest | 2 |
| High interest | 3 |
| Power (political authority) | No power | 0 |
| Low power | 1 |
| medium power | 2 |
| high power | 3 |
| Power (financial capacity) | No power | 0 |
| Low power | 1 |
| medium power | 2 |
| high power | 3 |
| Power (technical expertise) | No power | 0 |
| Low power | 1 |
| medium power | 2 |
| high power | 3 |
| Power (Leadership/organisation) | No power | 0 |
| Low power | 1 |
| medium power | 2 |
| high power | 3 |
| Power (Leadership/personal attribute) | No power | 0 |
| Low power | 1 |
| medium power | 2 |
| high power | 3 |
| Position (degree of support) | Strong opponent | 0 |
| Moderate opponent | 1 |
| Neutral | 2 |
| Moderate support | 3 |
| Strong support | 4 |
| Position (action taken) | Strong opponent | 0 |
| Moderate opponent | 1 |
| Neutral | 2 |
| Moderate support | 3 |
| Strong support | 4 |

***Source:** Heo, H.H., W. Jeong, X.H. Che, and H. Chung, *A stakeholder analysis of community-led collaboration to reduce health inequity in a deprived neighbourhood in South Korea.* Glob Health Promot, 2020. **27**(2): p. 35-44.
